# Supplementary material for: Erythromycin Restores Osteoblast Differentiation and Osteogenesis Suppressed by Porphyromonas gingivalis Lipopolysaccharide
Source: MDPI journal article supplement (doi:10.3390/ph16020303), 2023-02-15
Supplement: s1 [file s1]

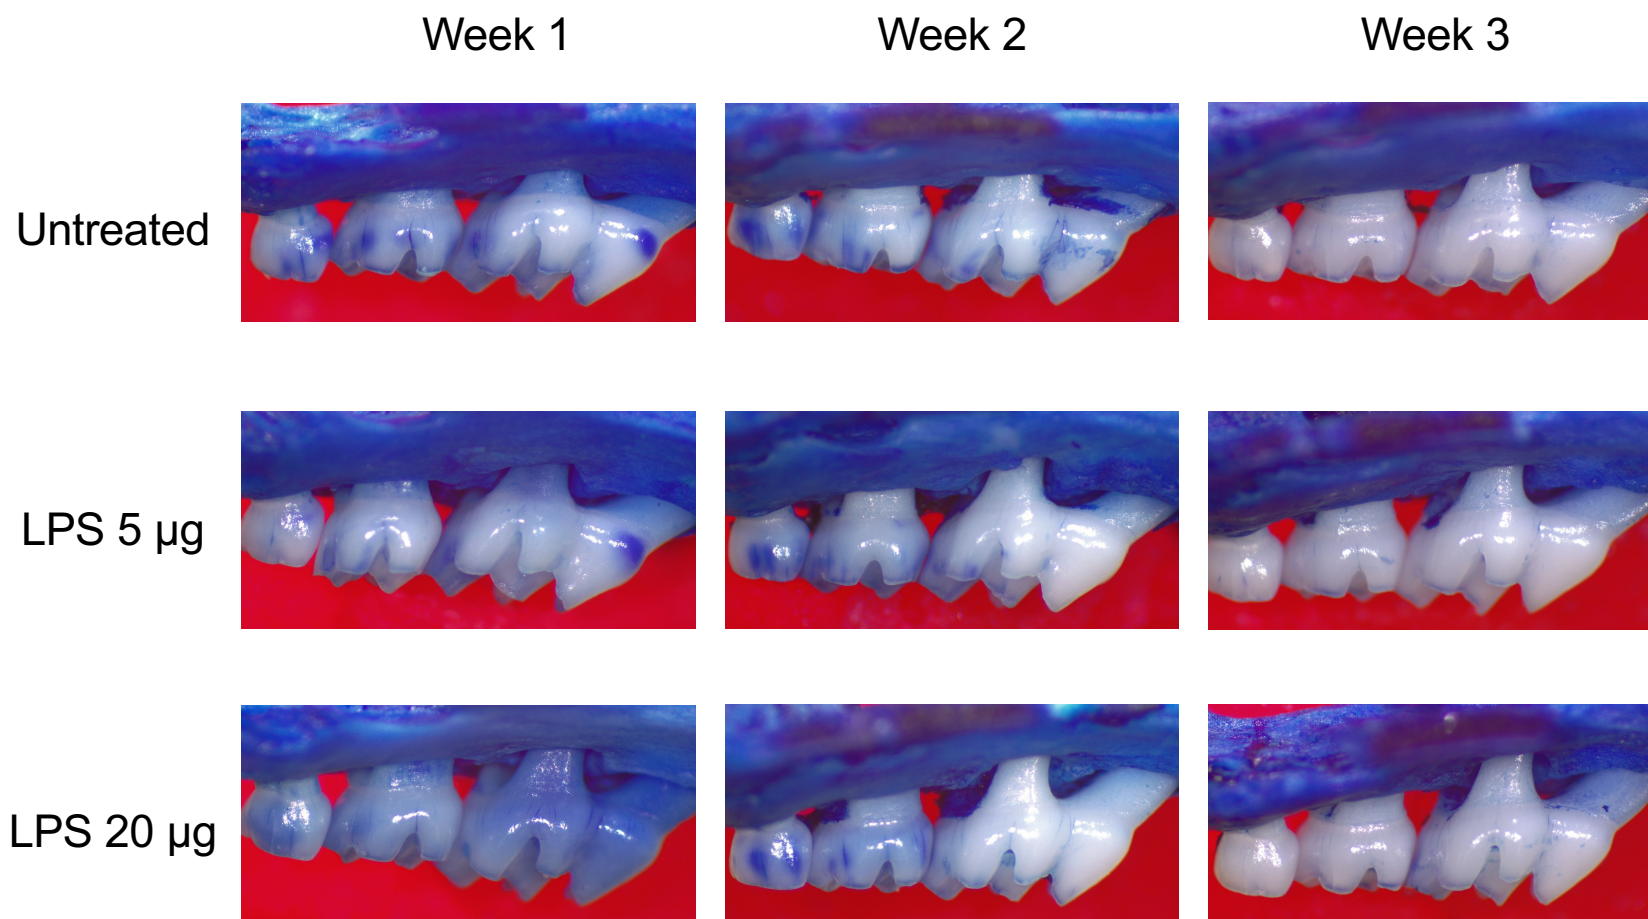

**Figure S1. Bone resorption in *Porphyromonas gingivalis* LPS-induced periodontitis.** Periodontal bone loss was induced by administration of *Porphyromonas gingivalis* LPS to maxillary molars. Representative images of mouse maxilla for each dose and time period.
