# Supplementary material for: Erythromycin Restores Osteoblast Differentiation and Osteogenesis Suppressed by Porphyromonas gingivalis Lipopolysaccharide
Source: MDPI journal article supplement (doi:10.3390/ph16020303), 2023-02-15
Supplement: s1 [file s1]

## **Supplemental Materials & Methods**

### *S1. Murine Model*

Periodontitis was induced in mice via microinjection of *P. gingivalis*-derived LPS (250 or 1000 µg/kg/d; InvivoGen, San Diego, CA, USA) into the palatal gingiva once a day for 1, 2, or 3 wks. Antibacterial drugs (ERM, 100 mg/kg body weight; PC, 10,000 unit/kg body weight; JSM, 100 mg/kg body weight) or 20% EtOH were administered intraperitoneally once a day for 1, 2, or 3 wks in the intervention experiments. The mice were euthanized 1, 2, or 3 wks after the start of *P. gingivalis* LPS administration.
